# Supplementary material for: Collagen complexes increase the efficiency of iPS cells generated using fibroblasts from adult mice
Source: PubMed Central journal article supplement — J Reprod Dev. 2015 Feb 3;61(2):145–53. doi: 10.1262/jrd.2014-081 (PMC4410313; doi:10.1262/jrd.2014-081), 2015-02-03
Supplement: jrd-61-145-s001.pdf [file jrd-61-145-s001.pdf]

1 **Supplementary Table.1 Primer sets used in this study**

| Genes               | Forward sequence               | Reverse sequence              |
|---------------------|--------------------------------|-------------------------------|
| Oct4                | GGAGGAAGCTGACAACAACG           | TCGTTGCGAATAGTCACTGC          |
| Klf4                | TCAGCCTCATCTTCTCCTC            | GTACACCGGGTCCAATTCAG          |
| Sox2                | GCCCTGCAGTACAACCTCCAT          | GCTGATCATGTCCCCTAGGT          |
| Nanog               | CAGGAGTTTGAGGGTAGCTC           | CGGTTTCATCATGGTACAGTC         |
| Integrin $\alpha$ 2 | CCATGATGGGTGCGAAGCTGA          | CTTCGTGCGCCACATTGAAA          |
| Integrin $\beta$ 1  | AATGTTTCAGTGCAGAGCC            | TTGGGATGATGTCCGGAC            |
| DDR1                | GGACATAACCGTGGGCGGACT          | CCATGCGCCACAACCTAGG           |
| Gli-1               | TGCCAGATATGCTTCAGCCA           | TGTGGCGAATAGACAGAGGT          |
| Bmi-1               | TTTTATGCAGCTCACCCGTC           | AGTGGGCCATTTCTTCTCCA          |
| Notch               | CACTGTGGGCGGGTCC               | GTTGTATTGGTTCCGGACCAT         |
| Atg4A               | CCCTCACACAACCCAGACTT           | CCCCTGTGGTTGTCACTTCT          |
| Atg4B               | TGCTTTGAGAACCCAGACCT           | CTCCTGACCCACTGCTCTTC          |
| Atg5                | GGAGAGAAGAGGAGCCAGGT           | TGTTGCCTCCACTGAACCTG          |
| Atg6                | GGCCAATAAGATGGGTCTGA           | GCTTTTGTCCACTGCTCCTC          |
| LC3                 | TTCTTCCTCCTGGTGAATGG           | GTGGGTGCTACGTTCTCAT           |
| Gabarap             | CAGCAGGAGGGGTAATGGTA           | CCAATGTCAATCCCTTCCAC          |
| Gapdh               | AGGTCGGTGTGAACGGATTTG          | TGTAGACCATGTAGTTGAGGTCA       |
| Utl1                | GGATGTCCCGGTGACTACGTCTG        | GGCGGATCTGGTTATCGAAGGGT       |
| Rrex1               | ACGAGTGGCAGTTTCTTCTGGGA        | TATGACTCACTTCCAGGGGGCACT      |
| Fbx15               | CAACAGCCTCAGTCTGTCA            | TCTGTGCGAGCCAATCATAG          |
| Dax1                | TGCTGCGGTCCAGGCCATCAAGAG       | GGGCACTGTTTCAGTTCAGCGGATC     |
| E-ras               | ACTGCCCTCATCAGACTGCTACT        | CACTGCCTTGTACTCGGGTAGCTG      |
| Cripto              | ATGGACGCAACTGTGAACATGATGTTGCA  | CTTTGAGGTCTGGTCCATCACGTGACCAT |
| p16                 | CGTACCCCGATTTCAGGTGAT          | TTGAGCAGAAGAGCTGCTACG         |
| p15                 | AGATCCCAACGCCCTGAAC            | CCCATCATCATGACCTGGATT         |
| p19                 | GCCGCACCGGAATCCT               | TTGAGCAGAAGAGCTGCTACGT        |
| p21                 | GTGGGTCTGACTCCAGCCC            | CCTTCTCGTGAGACGCTTAC          |
| p53                 | AAAGAGAGCGCTGCCACCT            | CTCCCGGAACATCTCGAAGC          |
| $\alpha$ -feto      | ATTCTTCGTTGTCAAGCCGCCAAAGTGGAG | AGTTGTTTGCTGCGGAGTTGTCTCTCGTC |
| Gata4               | ACCTTATGGCGTAGAAATGCTGAGGGTG   | CTGAATACTTGAGGTCACTGTTCTCGGG  |
| Brach               | ATGCCAAAGAAAGAAACGAC           | AGAGGCTGTAGAACATGATT          |
| Bmp4                | GGCGAAACCTGTGCGAGTGGATGCGGAA   | GATTGCTGTGCCGCCGCCGCTTCAGACC  |
| Nest                | GCTATTCGGCTATGACTGGGCACA       | CCACCATGATATTCGGCAAGCAGG      |
| $\beta$ -tub        | CATCGCCAGCCTCGGAACAAACAG       | TGCGCAAATGGAAGTGGAGGCAAC      |
| Akt                 | TCAAGAGGCAGGAAGAAGAGAC         | AAGGAAGGGATGCCTAGAGTTC        |
| mTOR                | CTCCGATTGTGAAATTGTTTGA         | TGCTGGTAAATCAAAGGGTCTT        |
| src                 | TTGTCCTGATCATTTCACACC          | AGATGCCACAAATCATCAACTG        |
| Map2k1              | TACTCTGTGCAGTCGGACATCT         | TGCTTCAGATCTGCTCTCTCTG        |

2

3

4
