# Supplementary material for: Collagen complexes increase the efficiency of iPS cells generated using fibroblasts from adult mice
Source: PubMed Central journal article supplement — J Reprod Dev. 2015 Feb 3;61(2):145–53. doi: 10.1262/jrd.2014-081 (PMC4410313; doi:10.1262/jrd.2014-081), 2015-02-03
Supplement: jrd-61-145-s002.pdf [file jrd-61-145-s002.pdf]

1 (A)

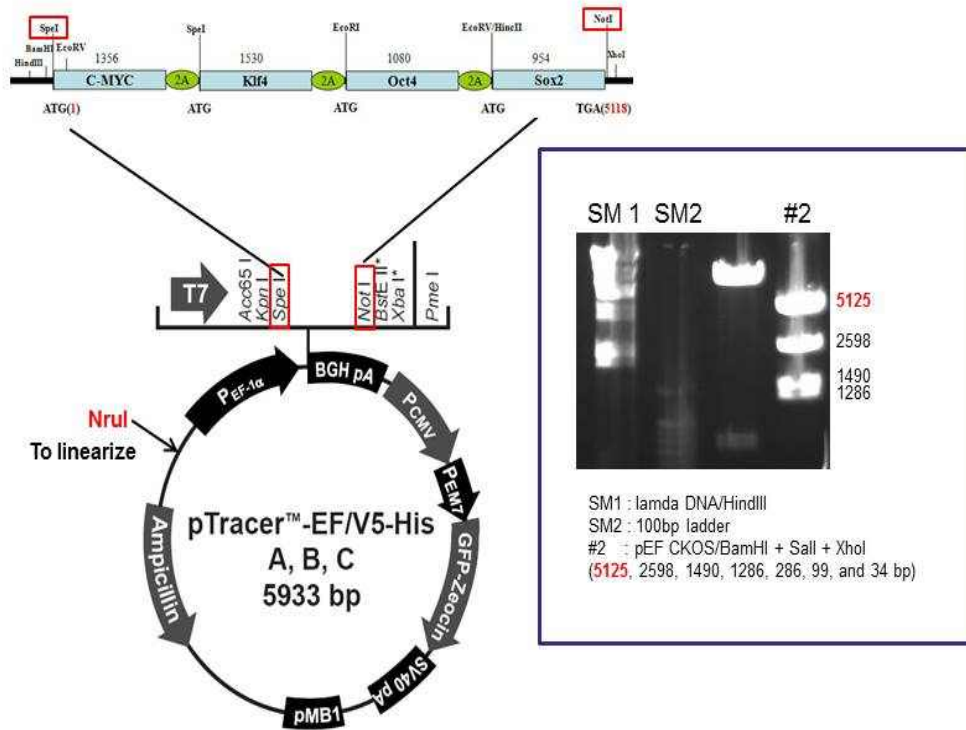

2

3 (B): CDS 5082 nts

4 **ATG**CCCCTCAACGTCAGCTTCACCAACAGGAACTATGACCTCGACTACGACTCGGTGCAGCC  
 5 TTATTTCTACTGCGACGAGGAGGAGAACTTCTACCAGCAGCAGCAGCAGAGCGAGCTGCAG  
 6 CCGCCGGCACCCAGCGAGGATATCTGGAAGAAATTCGAGTTGCTGCCACCCCGCCCCTGTC  
 7 CCCGAGCCGCCGCTCCGGGCTCTGCTCGCCCTCGTACGTCGCGGTCGCGTCCTTCTCCCCAG  
 8 GGGAGACGATGACGGCGGGCGGCAGCTTTTCCACGGCCGACCAGTTGGAGATGGTGACC  
 9 GAGCTGCTGGGAGGAGACATGGTGAACCAGAGCTTCATCTGCGACCCCGACGACGAGACCT  
 10 TCATCAAAAACATTATCATCCAGGACTGTATGTGGAGCGGCTTCTCAGCCGCCGCCAAGCTC

1 GTGTCAGAGAAGCTGGCCTCCTACCAGGCTGCGCGCAAAGACAGCGGCAGCCCGATTCCCG  
2 CCCGCGGGCACGGCGGCTACTCCACCTCCAGCTTGTACCTGCAGGACCTGAGCGCCGCGCC  
3 TCCGAATGCATCGACCCCTCGGTGGTCTTCCCCTACCCGCTCAACGACAGCAGCTCGCCAA  
4 GCCCTGCGCCTCCCCGACTCCACCGCCTTCTCCCCGTCCTCGGACTCTCTGCTCTCCTCCGC  
5 CGAGTCCTCCCCACGGGCCAGTCCCGAACCTTGGCTCTCCACGAGGAGACACCACCCACCA  
6 CCAGCAGCGACTCTGAGGAAGAACAAGAGGATGAGGAAGAAATTGATGTTGTTTCTGTGGA  
7 AAAGAGGCAGCCCCCTGCCAAAAGGTCGGAATCGGGGTCACCCTCTGCTGGAGGCCACAGC  
8 AAACCTCCTCACAGCCCCCTGGTCCTTAAGAGATGCCATGTGTCCACGCACCAGCACAAATTA  
9 TGCAGCGCCCCCTCCACCAGGAAGGACTATCCCTCTGCCAAGAGGGCTAAGTTGGACAGTG  
10 GCAGGGTCCTGAAACAGATCAGCAACAACCGAAAATGTGCCAGCCCAGGTCCTCGGACAC  
11 GGAGGAGAATGACAAGAGGCGGACACACAATGTCTTGGAACGCCAGAGGAGAAACGAGCT  
12 GAAACGCAGCTTTTTTGGCCCTTCGAGACCAGATCCCAGAGTTGGAGAACAATGAAAAAGCC  
13 CCCAAGGTAGTTATCCTTAAAAAAGCCACAGCTTACATCCTGTCTGTCCAAGCAGAGGAGCA  
14 AAAGCTCGTGTGTCAGAAAAAGACGTGCTGCGGAAGAGGCGAGAACAGTTGAAACTCAAATT  
15 GAACAGCTACGGAACTCTTGCCCAAGAGCCGAGGGCAGGGGAAGTCTTCTAACATGCGGGG  
16 ACGTGGAGGAAAATCCCGGGCCactagtATGCTGTCAGCGACGCACTGCTCCCGTCCTTCTC  
17 CACGTTTCGCGTCCGGCCCGGCGGGAAGGGAGAAGACTGCGTCCAGCAGGTGCCCCGAAT  
18 AACCGCTGGCGGGAGGAGCTCTCCACATGAAGCAAAGACTTCCCCCGGTGCTTCCCGGCCG  
19 CCCCTACGACCTGGCGGGCGGCGACCGTGGCCACCGACCTGGAGAGTGGCGGAGTCGGCGCG  
20 GCTTGCGGCAGTAGCAACCCGGCTCTTCTACCCCGGAGGGAGACGGAGGAGTTCAATGATCT  
21 CCTGGACCTGGACTTTATCCTCTCCAACTACTGTCTCATCAGGAGTCAGTGGCCGCCACCGT  
22 GTCCTCGTCGGCTTCAGCCTCATCCTCTTCTCCCATCGAGCAGCGGTCCCGCCAGTGCGCC  
23 CTCCACCTGCAGCTTCAGCTATCCGATCCGGGCTGGGGGCGACCCGGGCGTGGCACCGGGCA  
24 GCACTGGAGGCAGCCTCCTCTATGGCCGGGAGTCTGCACCTCCCCGACAGCTCCCTTCAAC  
25 CTGGCAGACATCAACGATGTGAGCCCCTCGGGCGGCTTCGTGGCCGAACCTCCTGCGGCCTGA

1 ATTGGACCCGGTGTACATTCCGCCGCAGCAGTCGCAGCCGCCAGGTGGCGGGCTGATGGGC  
2 AAGTTTGTGTTGAAGGCATCGCTGAGTGCCCCGGCAGCGAGTACGGCAGCCCATCGGTTCAT  
3 CAGTGTTAGCAAAGGCAGCCCAGATGGGAGCCACCCGGTGGTGGTGGCGCCCTACAGCGGT  
4 GGCCCGCCGCGCATGTGCCCAAGATCAAGCAGGAGGCTGTCTCCTCGTGCACCGTCGGCCG  
5 GCCCTTAGAGGCCCACTTGGGCACTGGACCCCCTCTCAGCAATGGCCACCGGCCGCCTGCC  
6 ACGACTTTCCCTGGGGCGGCAGCTCCCCAGCAGGACTACCCCAACCCTGGGTGCGGAGGA  
7 ACTGCTAAGCAGCAGGGACTGTCATCCTGCCCTGCCGCTCCCCCGGGCTTCCATCCCCACC  
8 ATGGGCCAAACTACCCACCCTTCCTGCCGGATCAGCTGCAGCCGCAGGTCCCACCGCTCCAT  
9 TACCAAGGTCAGTCCCGGGGAATCGTAGTTGGGGCTGGGGAGCCCTGCATCTGCCGGCCCTC  
10 TGGGGCCACGGAATGGTGTGACCCACCTTCTTACCCCTAGAGCTCATGCCACCTGGTT  
11 CCTGCATGCCAGAGGAGCCAAAGCCAAAGAGGGGGAGAAGGTCGTGGCCCCGGAAAAGGA  
12 CGGCCACTCACACTTGTGATTACGCGGGCTGCGGCAAACCTACACGAAGAGTTCTCATCTC  
13 AAGGCACACCTGCGAACCCACACAGGTGAGAAACCTTACCACTGTGACTGGGATGGCTGTG  
14 GGTGGAAATTTGCCCGCTCAGATGAACTGACCAGGCACTACCGCAAACATACTGGGCACCG  
15 CCCCTTCCAGTGCCAGAAGTGCGACCGGGCATTTC AAGGTCGGACCACCTTGCCTTACACA  
16 TGAAGAGGCATTTT**AGAGCCGAGGGCAGGGGAAGTCTTCTAACATGCGGGGACGTGGAGGA**  
17 **AAATCCCGGGCCC**gaattc**ATG**GCGGGACACCTGGCTTCCGACTTCGCCTTCTCGCCCCGCCG  
18 GGCGGTGGAGGCGATGGGCCGGGAGGGCCGGAGCCGGGCTGGGTTGATCCTCGGACCTGGC  
19 TGAGCTTCCAAGGGCCTCCCGGTGGGTGAGGATCGGGCCGGGGGTTGGGCCGGGCGCCGA  
20 GGTGTGGGGGCTTCCCGCGTGCCCCCGCCCTATGACTTCTGCGGAGGGATGGCCTACTGCG  
21 CACCTCAGGTCGGAGTGGGGCTGGTGCCCCAGGGCGGCCTGGAGACCCCTCAGCCCGAGGG  
22 CGAGGCGGGGGCCGGGGTGGAGAGCAACTCCGAGGGGGCCTCCCCGAGCCCTGTGCCGCC  
23 CCCGCTGGCGCCGCGAAGCTGGACAAGGAGAAGCTGGAGCCGAACCCCGAGGAGTCCCAGG  
24 ACATCAAAGCGCTTCAGAAAGATCTCGAACAATTTGCCAAGCTCCTAAAGCAGAAGAGGAT  
25 CACCCTGGGATATAACCAGGCCGATGTGGGGCTCACTTTGGGGGTTCTCTTTGGGAAGGTGT

1 TCAGCCAAACGACCATCTGCCGTTTTGAGGCTTTGCAGCTCAGTTTCAAGAACATGTGTAAG  
2 CTGCGGCCCTGCTGCAGAAGTGGGTGGAGGAAGCTGACAACAACGAGAATCTGCAGGAGA  
3 TATGCAAGGCAGAGACCCTCGTGCAGGCCCGGAAGAGAAAGCGGACAAGTATCGAGAACC  
4 GAGTGAGAGGCAACCTGGAGAGCATGTTCTGCAGTGCCCAAAGCCCCTCTGCAGCAGAT  
5 CAGCCACATCGCCAGCAGCTCGGGCTAGAGAAGGATGTGGTCCGCGTGTGGTTCTGCAACC  
6 GTCGCCAGAAGGGCAAACGATCAAGCAGTGACTATTCGCAACGAGAGGATTTTGAGGCTGC  
7 TGGGTCTCCTTTCCAGGGGGACCAGTATCCTTTCTCTGGCGCCAGGGCCCCATTTTGGTAC  
8 CCCAGGCTATGGGGGCCCTCACTTCACCACCCTGTACTCCTCGGTCCCATTCCCTGAGGGTG  
9 AGGCCTTTCCCTCGGTGTCTGTCACCCCTCTGGGCTCCCCATGCATTCAAACAGAGCCGAG  
10 GGCAGGGGAAGTCTTCTAACATGCGGGGACGTGGAGGAAAATCCCGGGCCgatgacATGTAC  
11 AACATGATGGAGACGGAGCTGAAGCCGCCCGGCCGCAGCAAACCTTCAGGGGGCGGCGGCG  
12 GCGGTGGCAACTCTACTGCTGCGGCGGCGGGCGGCAACCAGAAGAACAGCCCAGACCGAGT  
13 TAAGCGGCCCATGAACGCTTTCATGGTGTGGTCCCGAGGGCAGCGGCGCAAGATGGCCCAA  
14 GAGAACCCCAAGATGCACAACCTCGGAGATCAGCAAACGGCTGGGCGCCGAGTGGAACTTT  
15 TGTCGGAGACGGAGAAGCGGCCGTTTCATCGACGAGGCCAAGCGGCTGCGAGCGCTGCACAT  
16 GAAGGAGCACCCGGATTATAAATACCGGCCCGGCGGAAAACCAAGACGCTCATGAAGAAG  
17 GATAAGTACACACTGCCCGGAGGGCTGCTGGCCCCGGGAGGCAACAGCATGGCGAGCGGGG  
18 TCGGGGTGGGCGCCGGCCTCGGCGCGGGCGTGAACCAGCGCATGGACAGCTACGCGCACAT  
19 GAATGGCTGGAGCAACGGCAGCTACAGCATGATGCAGGACCAGCTGGGCTATCCGCAGCAC  
20 CCGGGCCTCAATGCGCACAGCGCGGCTCAGATGCAGCCCATGCACCGCTACGACGTGAGCG  
21 CCCTGCAGTACAACCTCCATGACCAGCTCGCAGACCTACATGAACGGCTCGCCACCTACAGC  
22 ATGTCCTACTCGCAGCAGGGCACCCCTGGCATGGCGCTCGGTTCCATGGGCTCAGTGGTCAA  
23 GTCCGAGGCGAGCTCCAGCCCCCGTGGTTACCTCTTCTTCCACTCCAGGGCGCCCTGCC  
24 AGGCCGGGGACCTACGGGACATGATCAGCATGTACCTCCCCGGCGCTGAGGTGCCAGAGCC  
25 CGCCGCCCCAGCAGACTTCACATGTCCCAGCACTACCAGAGCGGCCCGGTGCCCGGCACG

1 GCCATCAACGGTACACTGCCTCTCTCTCACATG  
2 **CGA** CATATGGGGAATC GAATTC CC **gcggccgc**TCGAG  
3  
4 (C) CKOS; 1694aa  
5 MPLNVSFTNRNYDLDYDSVQPYFYCDEEENFYQQQQSELQPPAPSEDIWKKFELLPTPPLSPSR  
6 RSGLCSPSYVAVASFSRGGDDGGGGSFSTADQLEMVTELLGGDMVNQSFICDPDDETFIKNIIIQ  
7 DCMWSGFSAAAKLVSEKLASYQAARKDSGSPIPARGHGGYSTSSLYLQDLSAAASECIDPSVVFP  
8 YPLNDSSSPKPCASPDSTAFSPSSDLLSSAESSPRASPEPLALHEETPPTSSDSEEEQEDEEEIDVV  
9 SVEKRQPPAKRSESGSPSAGGHSKPPHSPLVLKRCHVSTHQHNYAAPSTRKDYPYSAKRAKLDSG  
10 RVLKQISNNRKCASPRSSDTEENDKRRTHNVLERQRRNELKRSFFALRDQIPELENNEKAPKVVI  
11 LKKATAYILSVQAEQKLVSEKDVLKRREQLKLEQLRNSCPRAEGRGSLTTCGDVEENPGP  
12 TSMVSDALLPSFSTFASGPAGREKTLRPAGAPNNRWREELSHMKQRLPPVLPGRPYDLAAATV  
13 ATDLESGGVGAACGSSNPALLPRRETEEFNDLLDLFILSNLSHQESVAATVSSSASASSSSSPSS  
14 SGPASAPSTCSFSYPIRAGGDPGVAPGSTGGSLLYGRESAPPPTAPFNLADINDVSPSGGFVAELLR  
15 PELDPVYIPPQQSQPPGGGLMGKFLKASLSAPGSEYGSPSVISVSKGSPDGSHPVVVAPYSGGPP  
16 RMC PKIKQEAVSSCTVGRPLEAHLGTGPPLSNGHRPPAHDFPLGRQLPSRTTPTLGAEELSSRDC  
17 HPALPLPPGFHPHHGPNYPPFLPDQLQPVPPLHYQGQSRGIVVGAGEPCICRPSGAHGMVLTPPS  
18 SPLELMPPGSCMPEEPKPKRGRRSWPRKRTATHTCDYAGCGKTYTKSSHLKAHLRTHTGEKPYH  
19 CDWDGCGWKFARSDELTRHYRKHTGHRPFQCQKCDRAFSRSDHLALHMKRHFRAEGRGSLT  
20 CGDVEENPGPEFMAGHLASDFAFSPPPGGGGDGPGGPEPGWVDPRTWLSFQPPGGSGIGPGVG  
21 PGAEVWGLPACPPPYDFCGGMAYCAPQVGVGLVPQGGLETPQPEGEAGAGVESNSEGASPEPC  
22 AAPAGAAKLDKEKLEPNPEESQDIKALQKDLEQFAKLLKQKRITLGYTQADVGLTLGVLFKVF  
23 SQTICRFEALQLSFKNMCKLRPLLQKWVEEADNNENLQEICKAETLVQARKKRKRTSIENRVRG  
24 NLESMFLQCPKPTLQQISHIAQQLGLEKDVVVRVWFCNRRQKGRSSSDYSQREDFEAAGSPFPG  
25 GPVSFPLAPGPHFGTPGYGGPHFTTLYSSVPFPEGEAFPSVSVTPLGSPMHSNRAEGRGSLTTCGD

1 VEENPGPDDMYNMMETELKPPGPQQTSGGGGGGGNSTAAAAGGNQKNSPDRVKRPMNAFMV  
 2 WSRGQRRKMAQENPKMHNSEISKRLGAEWKLLSETEKRPFIDEAKRLRALHMKEHPDYKYRPR  
 3 RKTKTLMKKDKYTLPGLLAPGGNSMASGVGVGAGLGAGVNQRMDSYAHMNGWSNGSYSM  
 4 MQDQLGYPQHPGLNAHSAAQMMPMHRVDVSALQYNSMTSSQTYMNGSPTYSMSYSQQGTPG  
 5 MALGSMGSVVKSEASSPVPVTSSSHSRAPCQAGDLRDMISMYLPGAEVPEPAAPSRLHMSQHY  
 6 QSGPVPGTAINGTLP LSHM  
 7 (D)

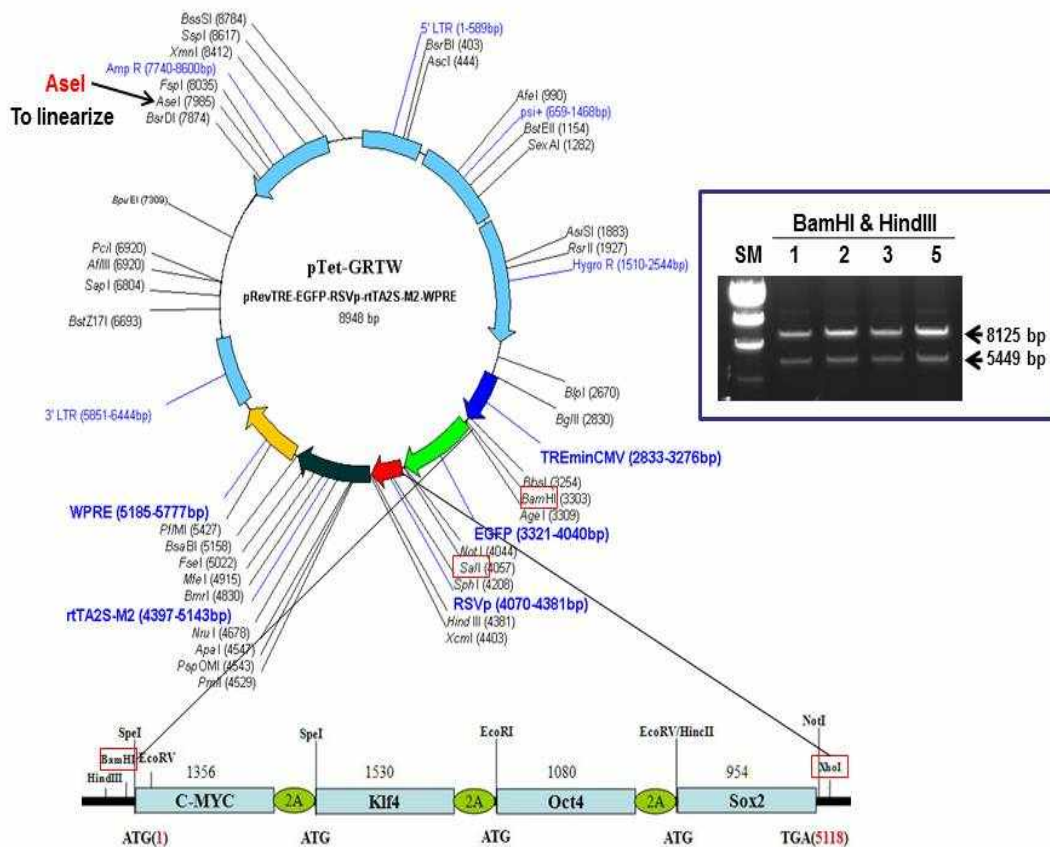

8  
 9

1 **Supplementary Fig. 1. Information on the pCKOS plasmid used for the production of transgenic**  
2 **mice.** The retrovirus vector was designed to express the four stemness factors by tetracyclin-mediated  
3 induction. For details, see Materials and Methods. (A) Construction of a pTracer-EF/V6-His A vector  
4 (Clontech) with appropriate restriction enzymes to generate pMyc-2A, pKlf4-2A, pOct4-2A and pSox2-  
5 2A vectors. (B) cDNA sequence of 5082 bp including C-Myc-2A, Klf4-2A, Oct4-2A and Sox2-2A. (C)  
6 Amino acid sequence. (D) Construction of pTet-GRTW to generate a pTet-CKOS plasmid.

7

8

9

10

11

12

13

14

15

16

17

18

19

20

21

22

23

24

25

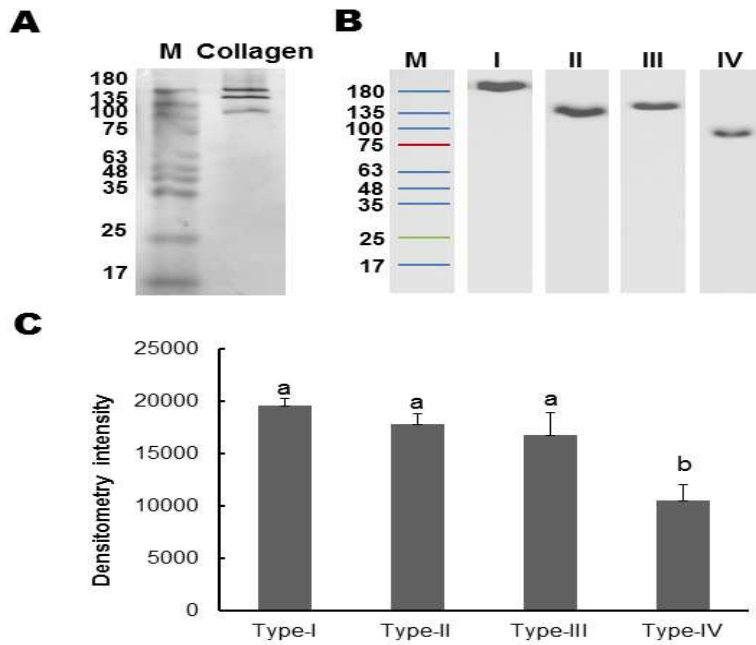

1

2 **Supplemntary Fig. 2. SDS-PAGE analysis.** A) SDS-PATE analysis of 1-month-old-derived collagen  
 3 complexes on 10% gel. Lane 1 and lane 2 indicate the protein maker and collagen complexes derived  
 4 from the 1-month-old mouse tail, respectively. B) Different types of collagen contained in collagen  
 5 complexes were determined by using Western blot analysis. C\_ Relative intensities of each collagen type  
 6 from (B) and results of three independent experoments (means  $\pm$  SD; lower panel). a and b)  $p < 0.05$ .

7

8

9

10

11

12

13

14

15



A

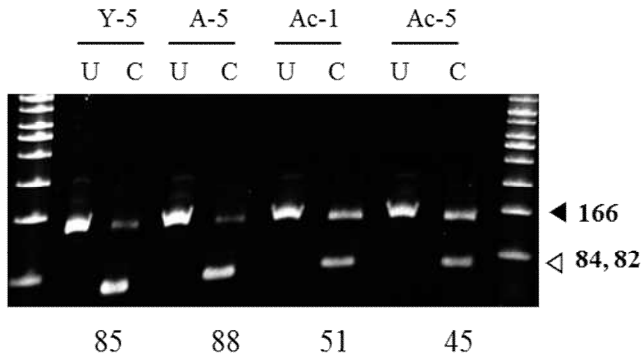

B

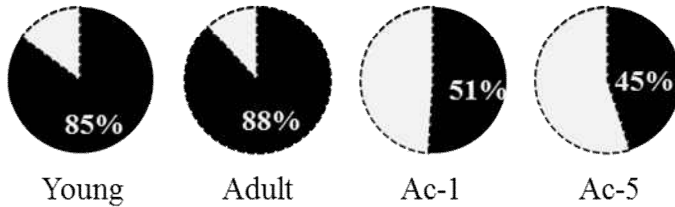

1

2 **Supplementary Fig. 3. Bisulfate restriction analysis of the PCNA gene promoter region in Y-, Ac-**

3 **and O-fibroblast cells.** A) Demethylation at the PCNA promoter gene sequence. M, DNA size marker

4 (bp); U, intact, undigested PCR products (166 bp); enzyme-treated PCR products (84 and 82 bp); Y,

5 young age-derived fibroblast; O, old age-derived fibroblast; Oc-1 and Oc-5, old age-derived fibroblast

6 cultured in the presence of collagen complexes for 1 day or 5 days. B) Validation of demethylation. The

7 percentage of methylated DNA is shown as a percentage of digested DNA (black). C) Comparison of the

8 methylation status of Oct3/4 promoter sequences. Percentage of methylation was calculated as the ration

9 of converting bas Cs to Ts following bisulfite treatment.

10

11

12

13

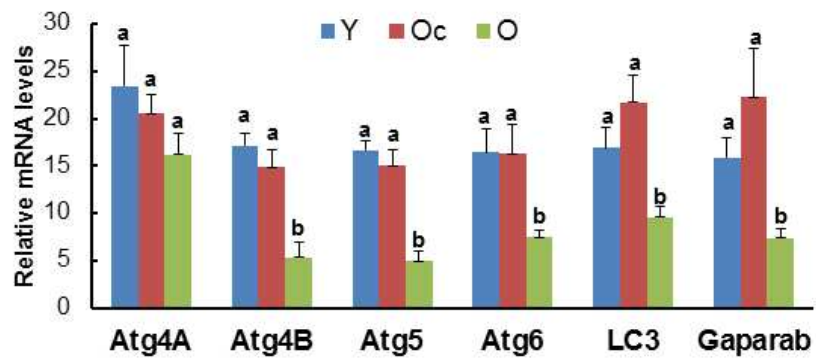

1

2 **Supplementary Fig. 4. Real-time RT-PCR analysis of autophagy-related genes.** Gene expression was

3 normalized using the GAPDH housekeeping gene. a and b)  $p < 0.05$ .
